# Supplementary material for: Communication with self, friends and foes in active-sensing animals
Source: Oxford University Press journal article supplement (doi:10.1242/jeb.242637), 2021-11-09
Supplement: jeb242637supp.pdf [file jeb242637supp.pdf]

**Table S1. List of studies that investigated adaptive adjustments in signal design.** Summaries of behaviors studies of jamming avoidance responses (JAR) in weakly electric fish. This list is an overview of papers describing jamming avoidance and active jamming literature in weakly electric fish of both lineages. It does not include all papers on the subject, (notably the extensive neurophysiologic studies into the mechanisms of the JAR are not included) but is rather an overview of behavioral reports and field studies describing JAR behaviors. Abbreviations: IPI- inter-pulse interval

| Species/Lineage                           | Electrolocation type | Study Site | Number of fish | Source of interference  | Type of interference | JAR                           |                                 | Author/Year            |
|-------------------------------------------|----------------------|------------|----------------|-------------------------|----------------------|-------------------------------|---------------------------------|------------------------|
|                                           |                      |            |                |                         |                      | Spectral                      | Temporal                        |                        |
| <i>Gymnarchus niloticus/Mormyrid</i>      | wave                 | lab        | Single         | Mimic EOD               | Passive              | Bidirectional frequency shift |                                 | (Bullock et al., 1975) |
|                                           | wave                 | Lab        | Single         | Mimic EOD               | Passive              | Bidirectional frequency Shift |                                 | (Metzner, 1993)        |
| <i>Gnathonemus petersii/Mormyrid</i>      | pulse                | lab        | Single+pairs   | Mimic EOD + Conspecific | Passive              |                               | echoing                         | (Russell et al., 1974) |
|                                           | Pulse                | Lab        | Pairs          | Conspecific             | Active               |                               | Echoing                         | (Russell et al., 1974) |
| <i>Brienomyrus niger/Mormyrid</i>         | pulse                | lab        | Single+pairs   | Mimic EOD+Conspecific   | Passive              |                               | Bidirectional IPI shift+echoing | (Heiligenberg, 1976)   |
| <i>Pollimyrus isidori/Mormyrid</i>        | Pulse                | Lab        | Single         | Mimic EOD               | Passive              |                               | echoing                         | (Kramer, 1978)         |
| <i>Hypopygus sp./Gymnotid</i>             | Pulse                | lab        | Single         | Mimic EOD               | Passive              |                               | Bidirectional IPI shift         | (Heiligenberg, 1974)   |
| <i>Gymnotus carapo/Gymnotid</i>           | Pulse                | Lab        | Single         | Mimic EOD               | Passive              |                               | Bidirectional IPI shift         | (Westby, 1975)         |
| <i>Gymnotus carapo/Gymnotid</i>           | Pulse                | Lab        | Pairs          | Conspecific             | Passive              |                               | Bidirectional IPI shift         | (Westby, 1979)         |
| <i>Brachyhypopomus sullivani/Gymnotid</i> | Pulse                | Lab        | Single         | Mimic EOD               | Passive              |                               | IPI Decrease                    | (Field et al., 2019)   |

|                                                   |       |       |        |                     |         |                                                          |                         |                                    |
|---------------------------------------------------|-------|-------|--------|---------------------|---------|----------------------------------------------------------|-------------------------|------------------------------------|
| <i>Microsternarchus cf. bi lineatus/ Gymnotid</i> | Pulse | Lab   | Single | Mimic EOD           | Active  |                                                          | Bidirectional IPI shift | (Field et al., 2019)               |
| <i>Steatogenys elegans/ Gymnotid</i>              | Pulse | Lab   | Single | Mimic EOD           | Active  |                                                          | Bidirectional IPI shift | (Field et al., 2019)               |
| <i>Sternopygus sp./ Gymnotid</i>                  | wave  | lab   | single | Mimic EOD           | Passive | No JAR observed                                          |                         | (Bullock et al., 1972)             |
|                                                   | wave  | lab   | single | Mimic EOD           | Passive | No JAR observed                                          |                         | (Matsubara and Heiligenberg, 1978) |
| <i>Eigenmannia viscerens/ Gymnotid</i>            | wave  | Lab   | Single | Mimic EDO           | Passive | Bidirectional frequency shift                            |                         | (Watanabe and Takeda, 1963)        |
|                                                   | Wave  | Lab   | Single | Mimic EOD           | Passive | Bidirectional frequency Shift                            |                         | (Bullock et al., 1972)             |
|                                                   | Wave  | Lab   | Single | Multiple Mimic EODs | Passive | Bidirectional frequency Shift                            |                         | (Partridge and Heiligenberg, 1980) |
|                                                   | Wave  | Lab   | Single | Multiple Mimic EODs | Passive | Bidirectional frequency Shift (Social Envelope Response) |                         | (Stamper et al., 2012)             |
| <i>Eigenmannia vicentespelea/ Gymnotid</i>        | Wave  | Field | Groups | Conspecific         | Passive | Few JARS observed                                        |                         | (Fortune et al., 2020)             |
| <i>Eigenmannia trilineata/ Gymnotid</i>           | Wave  | Field | Groups | Conspecific         | Passive | Few JARS observed                                        |                         | (Fortune et al., 2020)             |
| <i>Distocyclus conirostris/ Gymnotid</i>          | Wave  | Lab   | Single | Mimic EOD           | Passive | Predominately downwards frequency shift                  |                         | (Petzold et al., 2018)             |
| <i>Apteronotus sp./ Gymnotid</i>                  | Wave  | Lab   | Single | Mimic EOD           | Passive | Upwards frequency shift                                  |                         | (Bullock et al., 1972)             |
| <i>Apeteronotus macrostomas/ Gymnotid</i>         | Wave  | Field | Groups | Conspecific         | Active  | Upwards frequency shift                                  |                         | (Benda, 2020)                      |
| <i>Apteronotus leptorhynchus/ Gymnotid</i>        | Wave  | Lab   | Single | Mimic EOD           | Passive | Upwards frequency shift                                  |                         | (Bullock et al., 1972)             |

|  |      |     |        |             |         |                         |  |                              |
|--|------|-----|--------|-------------|---------|-------------------------|--|------------------------------|
|  | Wave | Lab | Single | Mimic EOD   | Passive | Upwards frequency shift |  | (Dye, 1987)                  |
|  | Wave | Lab | Pairs  | Conspecific | Active  | Upwards frequency shift |  | (Zakon et al., 2002)         |
|  | Wave | Lab | Pairs  | Conspecific | Active  | Upwards frequency shift |  | (Tallarovic and Zakon, 2005) |

**Table S2. List of studies that investigated adaptive adjustments in signal design.** Summaries of behaviors studies of jamming avoidance responses (JAR)\* and adaptive signal responses (ASA) in echolocating bats. This is meant to give a broad overview of the major findings of numerous papers on the topic of jamming and jamming avoidance in electric fish and bats. It is important to note that authors may use different methods for obtaining spectrotemporal parameter values and care should be taken if making direct comparisons. Abbreviations are as follows:  $F_{\max}$  = highest frequency in a call, sometimes referred to as start frequency in FM bats (Frequency-Modulated bats produce frequency sweeping echolocation calls), denoted as  $F_{\text{start}}$ ;  $F_{\min}$  = lowest frequency in a call, sometimes referred to as end frequency in FM bats, denoted as  $F_{\text{end}}$ ;  $F_{\text{bw}}$  = total bandwidth of a call;  $F_{\text{peak}}$  = the peak frequency of a call;  $F_{\text{call}}$  = the dominant frequency used by CF-FM bats (bats that produce calls with both constant frequency and frequency modulated portions) in the CF component of the call.

\*Not all studies were originally conducted in an effort to quantify bat JARs.

| Species                      | Dominant Echolocation Type | Study Site | Number of bats | Source of interference      | Type of interference | Task        | JAR/ASA                                          |                                          |           | Author/Year                  |
|------------------------------|----------------------------|------------|----------------|-----------------------------|----------------------|-------------|--------------------------------------------------|------------------------------------------|-----------|------------------------------|
|                              |                            |            |                |                             |                      |             | Spectral                                         | Temporal                                 | Intensity |                              |
| <i>Lasiurus borealis</i>     | FM                         | Field      | Pairs          | Bat (Conspecific)           | Passive              | Free Flight | Increase: $F_{\text{start}}$ , $F_{\text{peak}}$ | Increase: IPI<br>Decrease: call duration |           | Obrist 1995                  |
| <i>Tadarida teniotis</i>     | FM                         | Field      | Pairs          | Bat (Conspecific)           | Passive              | Free Flight | Bidirectional frequency shifts                   | None                                     |           | Ulanovsky <i>et al.</i> 2004 |
| <i>Taphozous perforatus</i>  | FM                         | Field      | Pairs          | Bat (Conspecific)           | Passive              | Free Flight | None                                             | None                                     |           | Ulanovsky <i>et al.</i> 2004 |
| <i>Tadarida brasiliensis</i> | FM                         | Field      | Group          | Recording (Conspecific)     | Passive              | Free Flight | Increase: $F_{\text{call}}$ , $F_{\text{bw}}$    | Decrease: IPI, call duration             |           | Gillam <i>et al.</i> 2007    |
|                              |                            | Lab        | Single         | Recording (Conspecific)     | Passive              | Free Flight | Not reported                                     | Reduce emission rate                     |           | Jarvis <i>et al.</i> 2013    |
|                              |                            | Lab        | Single         | Recording (Broadband noise) | Passive              | Free Flight | Not reported                                     | Reduce emission rate                     |           | Jarvis <i>et al.</i> 2010    |

|                               |       |       |        |                                           |         |                       |                                                                      |                                                          |                     |                                   |
|-------------------------------|-------|-------|--------|-------------------------------------------|---------|-----------------------|----------------------------------------------------------------------|----------------------------------------------------------|---------------------|-----------------------------------|
|                               |       | Lab   | Single | Recording (Broadband noise)               | Passive | Stationary            | Increase: $F_{start}$ , $F_{bw}$ , $F_{peak}$<br>Decrease: $F_{end}$ | Increase: call duration                                  | Increase: amplitude | Tressler and Smotherman 2009      |
|                               |       | Field | Pairs  | Bat (Conspecific)                         | Passive | Free Flight           | Greater difference $F_{peak}$                                        | None                                                     |                     | Ratcliffe <i>et al.</i> 2004      |
|                               |       | Lab   | Pairs  | Bat (Conspecific) Recording (Conspecific) | Passive | Obstacle avoidance    | Not reported                                                         | Reduce emission rate                                     |                     | Adams <i>et al.</i> 2017          |
|                               |       | Field | Group  | Recording (Conspecific)                   | Active  | Tethered prey capture | Increase: $F_{peak}$ , $F_{min}$ , $F_{max}$                         | None                                                     |                     | Corcoran and Conner 2014          |
|                               |       | Field | Group  | Recording (CF and FM sounds)              | Passive | Free Flight           | Increase: $F_{start}$ , $F_{end}$ , $F_{max}$                        | Not reported                                             |                     | Gillam and Montero 2016           |
| <i>Rhinopoma microphyllum</i> | CF-FM | Field | Group  | Bat (Conspecific)                         | Passive | Free Flight           | Increase: $F_{call}$ , $F_{bw}$                                      | Decrease: call duration                                  |                     | Cvikel, Levin, <i>et al.</i> 2015 |
|                               |       | Lab   | Single | Noise                                     | Passive | Free Flight           | None                                                                 | Not reported                                             | Increase: intensity | Schmidt and Joermann 1986         |
| <i>Eptesicus fuscus</i>       | FM    | Lab   | Pairs  | Bat (Conspecific)                         | Passive | Tethered prey capture | Increase: $F_{start}$ , $F_{end}$ , $F_{bw}$                         | None                                                     |                     | Chiu <i>et al.</i> 2009           |
|                               |       | Lab   | Single | Moth Prey                                 | Active  | Tethered prey capture | None                                                                 | Decrease: buzz phase duration<br>Increase: call duration |                     | Corcoran <i>et al.</i> 2011       |
|                               |       | Lab   | Pairs  | Bat (Conspecific)                         | Passive | Tethered prey capture | Silence                                                              | Silence                                                  |                     | Chiu <i>et al.</i> 2008           |

|                                           |    |       |        |                                           |         |                                  |                                            |                                                 |  |                               |
|-------------------------------------------|----|-------|--------|-------------------------------------------|---------|----------------------------------|--------------------------------------------|-------------------------------------------------|--|-------------------------------|
|                                           |    | Lab   | Single | Recording (CF tone)                       | Passive | Non-flying/target discrimination | Bidirectional shift of QCF component       | None                                            |  | Bates <i>et al.</i> 2008      |
|                                           |    | Lab   | Single | Recording (Heterospecific)                | Active  | Tethered prey capture            | Increase: $F_{peak}$<br>Decrease: $F_{bw}$ | Decrease: sweep rate<br>Increase: call duration |  | Jones <i>et al.</i> 2018      |
| <i>Pipistrellus abramus</i>               | FM | Lab   | Single | Bat (Conspecific) Recording (Conspecific) | Passive | Free Flight                      | Increase: $F_{end}$                        | Alter emission timing                           |  | Takahashi <i>et al.</i> 2014  |
| <i>Corynorhinus (Plecotus) townsendii</i> | FM | Lab   | Single | Recording (Broadband noise)               | Passive | Obstacle avoidance               | Not reported                               | Not reported                                    |  | Griffin <i>et al.</i> 1963    |
| <i>Pipistrellus nathusii</i>              | FM | Field | Group  | Bat (Conspecific) Bat (Heterospecific)    | Passive | Free Flight                      | Increase: $F_{peak}$                       | Not reported                                    |  | Necknig and Zahn 2011         |
| <i>Pipistrellus pipistrellus</i>          | FM | Field | Group  | Bat (Conspecific) Bat (Heterospecific)    | Passive | Free Flight                      | Increase: $F_{peak}$                       | Not reported                                    |  |                               |
|                                           |    | Lab   | Group  | Bat (Conspecific) Bat (Heterospecific)    | Passive | Free Flight                      | Increase: differences in $F_{peak}$        | None                                            |  | Bartonička <i>et al.</i> 2007 |

|                                    |       |       |        |                                             |         |                                            |                                              |                                       |                     |                             |
|------------------------------------|-------|-------|--------|---------------------------------------------|---------|--------------------------------------------|----------------------------------------------|---------------------------------------|---------------------|-----------------------------|
|                                    |       | Field | Group  | Bat (Conspecific)                           | Passive | Free Flight                                | Increased: differences in CF-portion of call | Not reported                          |                     | Miller and Degn 1981        |
| <i>Balantiopteryx plicata</i>      | CF-FM | Field | Group  | Bat (Conspecific)                           | Passive | Free Flight                                | Increase: difference $F_{peak}$ , $F_{max}$  | Not reported                          |                     | Ibáñez <i>et al.</i> 2004   |
| <i>Rhinopoma hardwickei</i>        | CF-FM | Field | Group  | Bat (Conspecific)                           | Passive | Free Flight                                | Utilized 3 different CF bands                | Not reported                          |                     | Habersetzer 1981            |
| <i>Pipistrellus kuhlii</i>         | FM    | Lab   | Single | Recording (Conspecific)<br>Recording (Self) | Passive | Landing on platform;<br>Obstacle avoidance | Increased: $F_{bw}$                          | Increase: call duration (QCF portion) | Increase: intensity | Amichai <i>et al.</i> 2015  |
| <i>Craseonycteris thonglongyai</i> | CF-FM | Field | Group  | Bat (Conspecific)                           | Passive | Free Flight                                | None                                         | None                                  |                     | Surlykke <i>et al.</i> 1993 |
| <i>Hipposideros speoris</i>        | CF-FM | Lab   | Group  | Bat (Conspecific)                           | Passive | Free Flight                                | Bidirectional shift                          | Not reported                          |                     | Jones <i>et al.</i> 1994    |
|                                    | CF-FM | Lab   | Single | Recording (Conspecific)<br>Recording (Self) | Passive | Obstacle avoidance                         | Small scale frequency changes                | Not reported                          |                     | Jones <i>et al.</i> 1994    |
| <i>Hipposideros fulvis</i>         | CF-FM | Lab   | Single | Recording (Conspecific)<br>Recording (Self) | Passive | Obstacle avoidance                         | Small scale frequency changes                | Not reported                          |                     |                             |
| <i>Asella tridens</i>              | CF-FM | Lab   | Group  | Bat (Conspecific)                           | Passive | Free Flight                                | None                                         | Not reported                          |                     | Jones <i>et al.</i> 1993    |

|                                |       |     |        |                       |         |             |                                              |                                                                        |                     |                            |
|--------------------------------|-------|-----|--------|-----------------------|---------|-------------|----------------------------------------------|------------------------------------------------------------------------|---------------------|----------------------------|
| <i>Miniopterus fuliginosus</i> | FM    | Lab | Single | Recording (FM sounds) | Passive | Free Flight | Increased: $F_{end}$                         | Not reported                                                           |                     | Hase <i>et al.</i> 2016    |
| <i>Rhinolophus capensis</i>    | CF-FM | Lab | Group  | Bat (Conspecific)     | Passive | Free Flight | Decrease: $F_{min}$ in terminal FM component | Increase: duration of terminal FM component                            | Decrease: intensity | Fawcett <i>et al.</i> 2015 |
|                                |       | Lab | Group  | Bat (Heterospecific)  | Passive | Free Flight | Decrease: $F_{min}$ in terminal FM component | Decrease: call duration<br>Increase: duration of terminal FM component |                     |                            |
